# Supplementary material for: Assessing capacity to social distance and neighborhood-level health disparities during the COVID-19 pandemic
Source: PubMed Central journal article supplement — medRxiv. 2020 Jun 13:2020.06.02.20120790. Preprint. [Version 2] doi: 10.1101/2020.06.02.20120790 (PMC7302284; doi:10.1101/2020.06.02.20120790), 2020-06-13

**Supplemental materials:**

**Supplemental Table 1: 2018 American Community Survey (ACS) 5-year estimate variables collected via *tidycensus* R package for ZIP code tabulation area (ZCTA) units.**

| ACS Variable Name | Short description                                          | Explanation                                                          |
|-------------------|------------------------------------------------------------|----------------------------------------------------------------------|
| B19013_001        | Median income                                              | Measure of neighborhood-level access to financial/economic resources |
| B06012_002        | Federal Poverty Level (below 100%)                         |                                                                      |
| B06012_003        | Federal Poverty Level (between 100-150%)                   |                                                                      |
| B23025_005        | Unemployed                                                 |                                                                      |
| B22003_002        | Households with supplemental nutrition assistance (SNAP)   | Financial/economic resources and food access                         |
| B01003_001        | Total population per ZCTA                                  | For adjustment and crude population incidence calculations           |
| B22003_001        | Total households per ZCTA                                  | To create household-based proportions                                |
| B27010_017        | Uninsured (Under 19 years old)                             | Access to care and medical information/warnings                      |
| B27010_033        | Uninsured (19-34 years old)                                |                                                                      |
| B27010_050        | Uninsured (35-64 years old)                                |                                                                      |
| B27010_066        | Uninsured (65+ years old)                                  |                                                                      |
| B08301_021        | Work from home                                             | Capacity to socially distance in early stages of pandemic            |
| C24050_002        | Employed by: Agricultural industry                         | Industries that are likely to employ essential workers               |
| C24050_003        | Employed by: Construction industry                         |                                                                      |
| C24050_005        | Employed by: Wholesale trade                               |                                                                      |
| C24050_007        | Employed by: Transportation industry                       |                                                                      |
| C24050_011        | Employed by: Education and Healthcare industry             |                                                                      |
| B08126_017        | Employed by: Agriculture, Commute: personal car            | Mode of transportation for industries employing essential workers    |
| B08126_047        | Employed by: Agriculture, Commute: Public Transit          |                                                                      |
| B08126_018        | Employed by: Construction, Commute: personal car           |                                                                      |
| B08126_048        | Employed by: Construction, Commute: Public Transit         |                                                                      |
| B08126_020        | Employed by: Wholesale trade, Commute: personal car        |                                                                      |
| B08126_050        | Employed by: Wholesale trade, Commute: Public Transit      |                                                                      |
| B08126_022        | Employed by: Transportation, Commute: personal car         |                                                                      |
| B08126_052        | Employed by: Transportation, Commute: Public Transit       |                                                                      |
| B08126_026        | Employed by: Education/Healthcare, Commute: personal car   |                                                                      |
| B08126_056        | Employed by: Education/Healthcare, Commute: Public Transit |                                                                      |

**Supplemental Fig. 1 Cumulative infections and COVID mortality per 100,000 by ZCTA as of May 7, 2020 and May 23, 2020 respectively.**

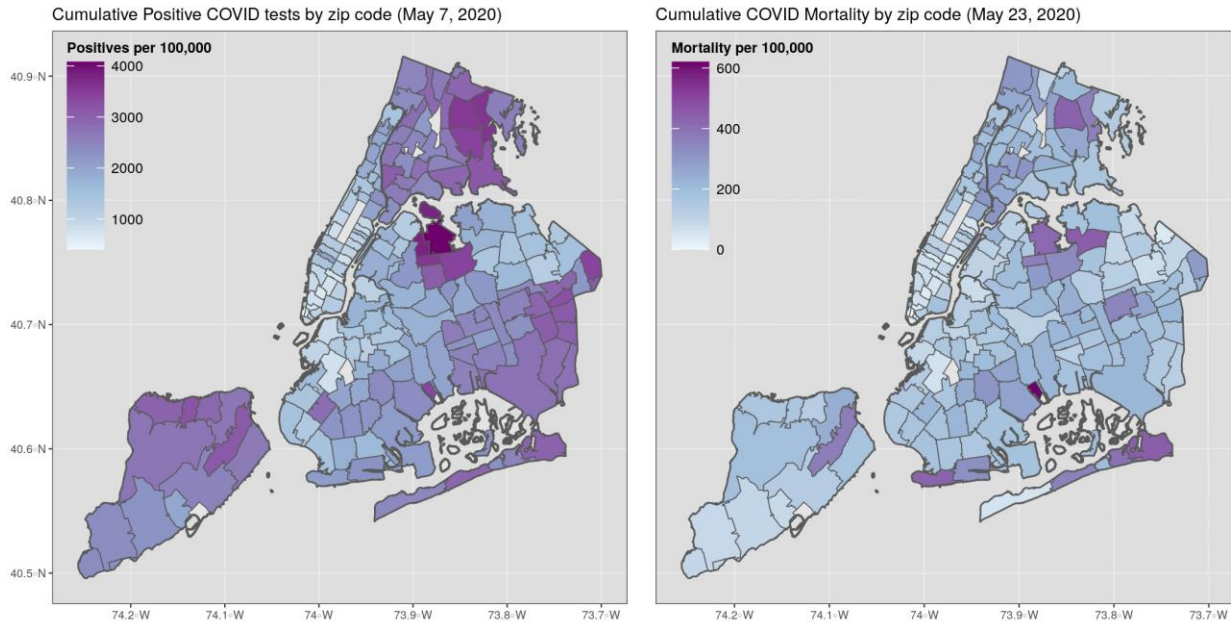

**Supplemental Fig. 2 Race/ethnic composition of ZCTAs that fall within various quantiles of the BWQS infection risk index.** Race/ethnic data from the 2018 ACS. NYC total demographic breakdown provided as reference.

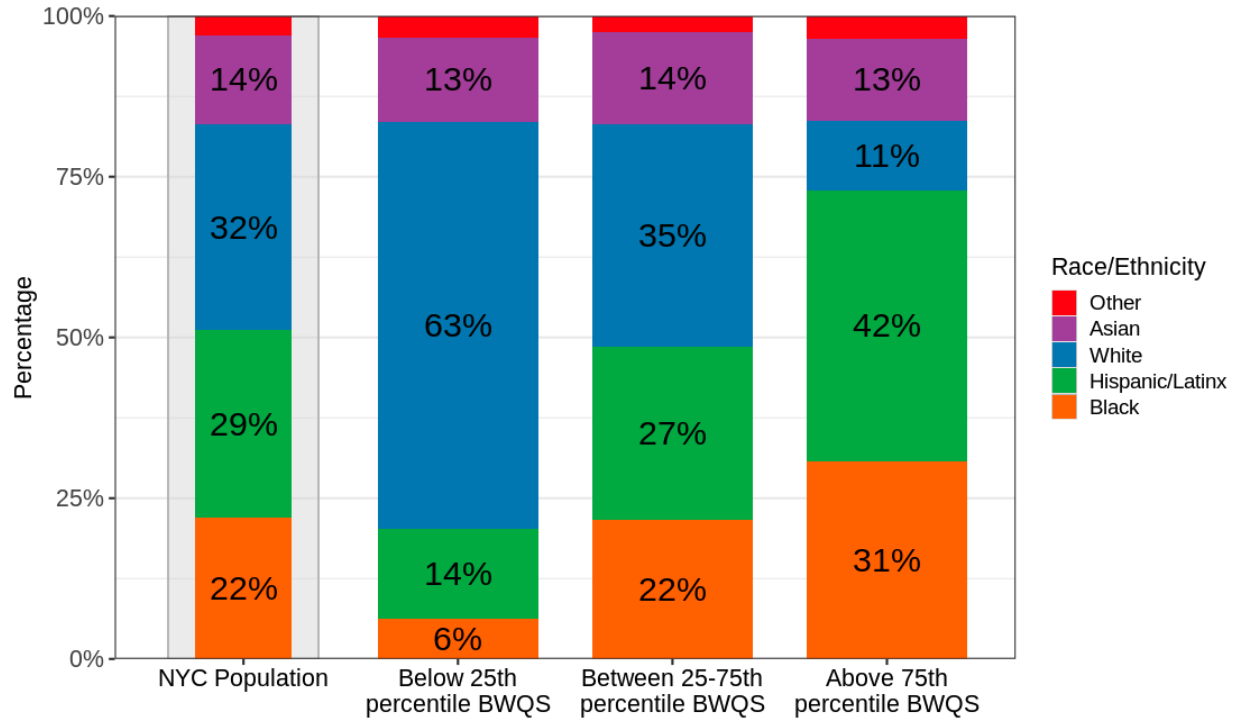

**Supplemental Table 2: Kendall's tau correlations for social determinants with per capita cumulative SARS-CoV-2 infection incidence as of May 7, 2020 by NYC ZCTA.**

| Variable                                                               | Correlation | P value |
|------------------------------------------------------------------------|-------------|---------|
| 1/median income                                                        | 0.317       | <0.0001 |
| Not insured (%)                                                        | 0.231       | <0.0001 |
| Unemployed (%)                                                         | 0.296       | <0.0001 |
| 1/grocers per 1000 people                                              | 0.261       | <0.0001 |
| Essential workers (%)                                                  | 0.544       | <0.0001 |
| Essential workers commuting via public transit (%)                     | 0.174       | 0.0001  |
| Essential workers commuting via car (%)                                | 0.493       | <0.0001 |
| People who do not work from home (%)                                   | 0.454       | <0.0001 |
| Population density according to housing volume (people per cubic foot) | 0.096       | 0.058   |
| Average household size (#)                                             | 0.467       | <0.0001 |

**Supplemental Fig. 3 UHF neighborhoods by population-weighted neighborhood infection risk index.** Six UHF neighborhoods excluded from the subway ridership analysis are indicated by asterisks. Dots represent subway stations with available data. UHF neighborhoods are colored as high (above median) or low (below median) BWQS infection risk index.

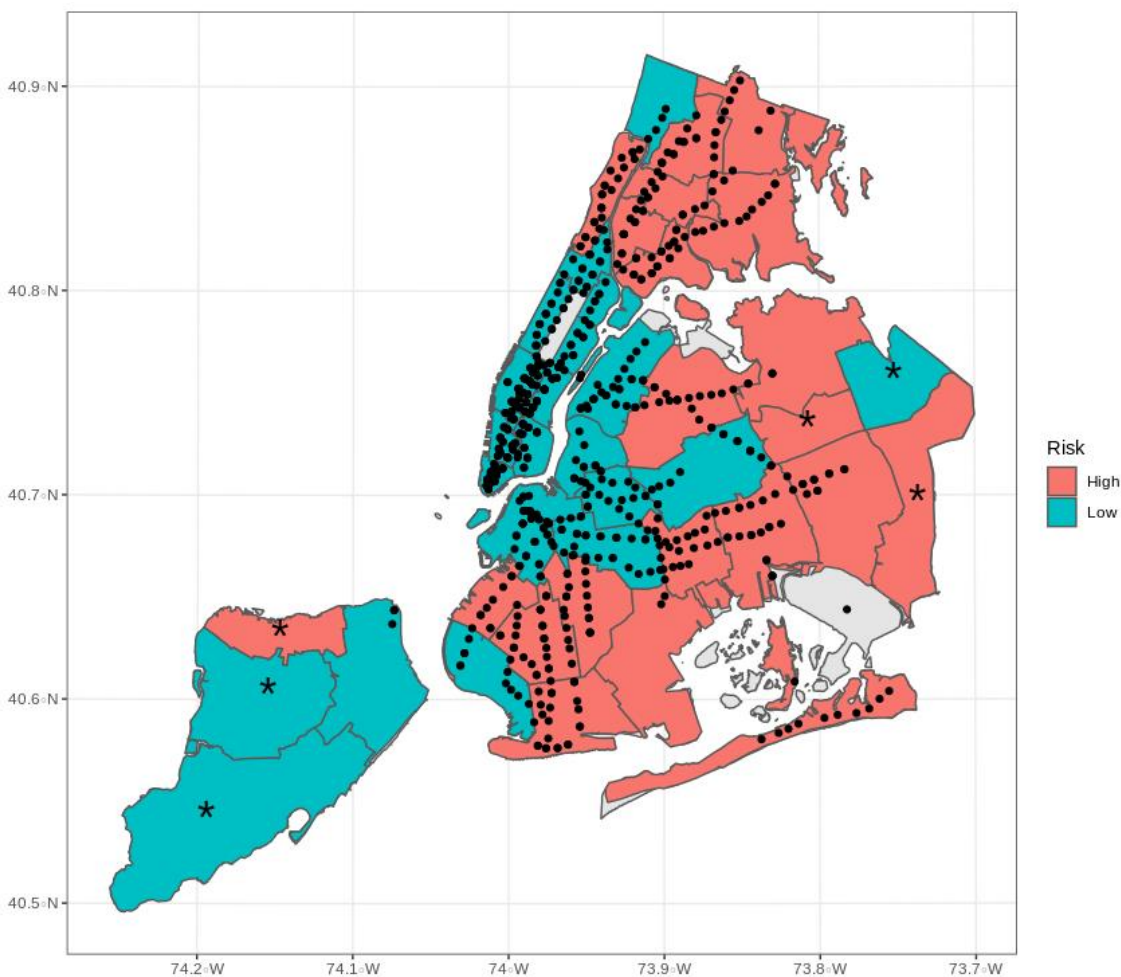

**Supplemental Fig. 4** Fit of the generalized Weibull equation curve on the citywide mean of UHF-level ridership. Outlier on February 15th, a national holiday. Values above 1 indicate above-average ridership per our comparison with 2015-2019.

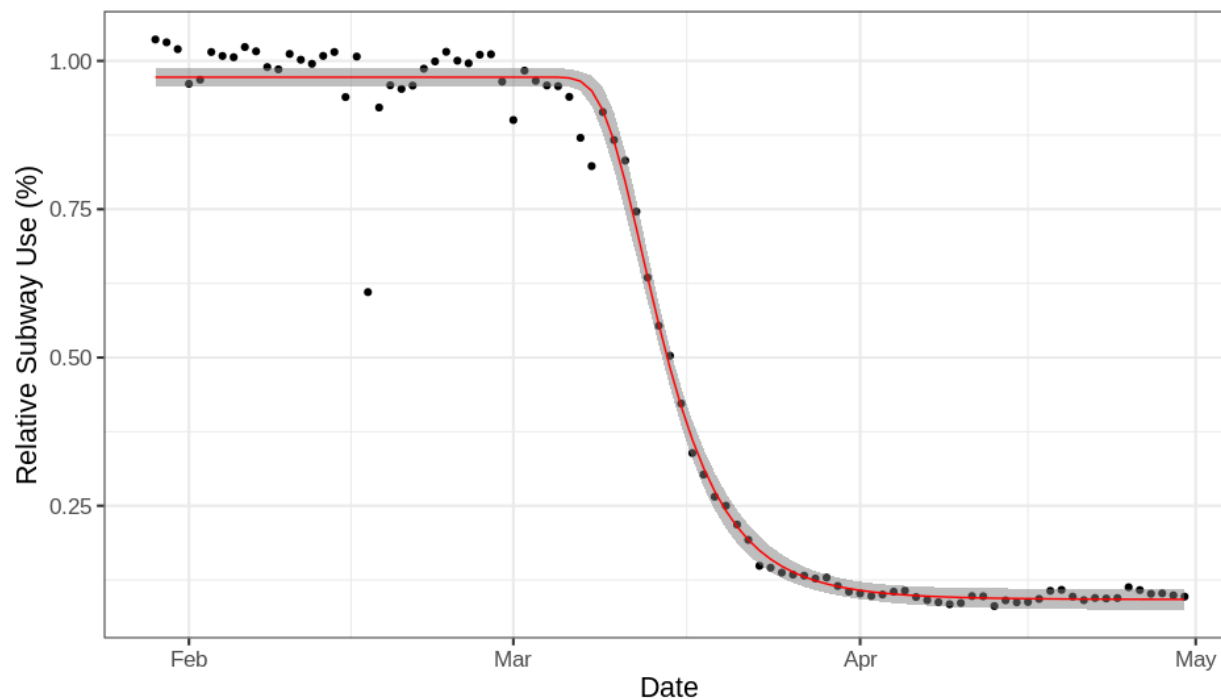

Supplement: NIHPP-2020.06.02.20120790-supplement-1.pdf [file NIHPP-2020.06.02.20120790-supplement-1.pdf]
